# Supplementary material
Source: PubMed Central journal article supplement (PMC3473162)
Supplement: NIHMS401432-supplement-1.pdf [file NIHMS401432-supplement-1.pdf]

Supplementary Table 1. Newly acquired unpublished clinical data for cases previously described by our group

| Case         | Reference | Outcomes         |           |               | Treatment Details |           |           | Clinical Data           |                         | Molecular Data     |
|--------------|-----------|------------------|-----------|---------------|-------------------|-----------|-----------|-------------------------|-------------------------|--------------------|
|              |           | Overall Survival | PFS       | Best Response | Chemo             | RT        | Surgery   | Demographics (Age, Sex) | Disease location/extent | NUT fusion partner |
| 1            | 4         |                  |           | X             | X                 | X         | X         |                         | X                       |                    |
| 2            | 4         |                  |           | X             | X                 | X         | X         |                         | X                       |                    |
| 3            | 4         |                  |           | X             | X                 | X         | X         |                         | X                       |                    |
| 4            | 4         |                  |           | X             | X                 | X         | X         |                         | X                       |                    |
| 5            | 4         |                  |           | X             | X                 | X         | X         |                         | X                       |                    |
| 6            | 23        | X                | X         | X             | X                 | X         | X         |                         | X                       |                    |
| 7            | 17        | X                | X         | X             | X                 | X         | X         | X                       | X                       | X                  |
| 8            | 17        | X                | X         | X             | X                 | X         | X         | X                       | X                       | X                  |
| 9            | 17        | X                | X         | X             | X                 | X         | X         | X                       | X                       | X                  |
| 10           | 17        | X                | X         | X             | X                 | X         | X         | X                       | X                       | X                  |
| 11           | 17        | X                | X         | X             | X                 | X         | X         | X                       | X                       | X                  |
| 12           | 17        |                  |           |               |                   |           |           | X                       | X                       | X                  |
| 13           | 17        | X                | X         | X             | X                 | X         | X         | X                       | X                       | X                  |
| 14           | 17        | X                | X         | X             | X                 | X         | X         | X                       | X                       | X                  |
| 15           | 17        | X                | X         | X             | X                 | X         | X         | X                       | X                       | X                  |
| 16           | 17        | X                | X         | X             | X                 | X         | X         | X                       | X                       | X                  |
| 17           | 17        |                  |           |               |                   |           |           | X                       | X                       | X                  |
| 18           | 24        |                  |           |               |                   |           |           |                         |                         |                    |
| 19           | 8, 2      |                  |           |               |                   |           |           |                         |                         |                    |
| 20           | 8, 2      |                  |           |               |                   |           |           |                         |                         |                    |
| 21           | 18        |                  | X         | X             | X                 | X         | X         |                         | X                       |                    |
| 22           | 18        |                  |           |               |                   |           |           |                         |                         |                    |
| 23           | 18        |                  | X         | X             | X                 | X         | X         |                         |                         |                    |
| 24           | 18        |                  | X         | X             | X                 | X         | X         |                         |                         |                    |
| 25           | 18        |                  | X         | X             | X                 | X         | X         |                         |                         |                    |
| 26           | 18        |                  | X         | X             | X                 | X         | X         |                         |                         |                    |
| 27           | 18        |                  | X         | X             | X                 | X         | X         |                         |                         |                    |
| 28           | 18        |                  | X         | X             | X                 | X         | X         |                         |                         |                    |
| 29           | 6         | X                | X         |               |                   |           |           |                         |                         |                    |
| 30           | 15        | X                | X         |               |                   |           |           |                         |                         |                    |
| 31           | 3         |                  | X         | X             | X                 | X         | X         |                         | X                       |                    |
| 32           | 13        |                  |           |               |                   |           |           |                         |                         |                    |
| 33           | 13        |                  |           |               |                   |           |           |                         |                         |                    |
| 34           | 12        |                  |           |               |                   |           |           |                         |                         |                    |
| 35           | 22        | X                | X         | X             | X                 | X         | X         |                         | X                       |                    |
| <b>Total</b> | <b>35</b> | <b>13</b>        | <b>21</b> | <b>24</b>     | <b>24</b>         | <b>24</b> | <b>24</b> | <b>11</b>               | <b>20</b>               | <b>11</b>          |

X, new data which is presented in this manuscript, but was not present in the original publication; PFS, progression-free survival; Chemo, chemotherapy; RT, radiation therapy.
